# Supplementary material for: New insight from MALDI-TOF MS and multivariate data analysis on the botanical origin of polysaccharide-based paint binders in ancient Egypt
Source: Royal Society of Chemistry journal article supplement (doi:10.1039/d3ay02214e), 2024-01-01
Supplement: d3ay02214e5.pdf [file d3ay02214e5.pdf]

## Supplementary information

### **Title:**

New insight from MALDI-TOF MS and multivariate data analysis on the botanical origin of polysaccharide-based paint binders in ancient Egypt

### **Authors:**

Clara Granzotto<sup>1\*</sup>, Amra Aksamija<sup>1,2</sup>, Gerjen H. Tinnevelt<sup>3</sup>, Viktoriia Turkina<sup>3</sup>, Ken Sutherland<sup>1</sup>

<sup>1</sup>Art Institute of Chicago, Department of Conservation and Science, 111 S. Michigan Ave, Chicago, IL 60603, USA.

<sup>2</sup>Center for Scientific Studies in the Arts, Northwestern University, Tech building, 2145 Sheridan Road, Evanston, IL 60208, USA.

<sup>3</sup>Radboud University, Institute for Molecules and Materials, (Analytical Chemistry & Chemometrics), P.O. Box 9010, 6500 GL, Nijmegen, The Netherlands.

### **Table of contents:**

1. Details of the reference acacieae samples analyzed.
2. MALDI-TOF MS analysis of pigmented *S. senegal* reference samples.
3. PC1 and PC3 scores plot of acacieae reference and historic samples.
4. Mummy cartonnage (AIC 1893.15): analysis results and parameters.
5. Bibliography

1. Table S1. List of the reference acacieae samples analyzed: reference sample acronym, reference sample number used in PCA analysis, reference sample catalog number, original and updated taxonomy, origin and supplier.

| Sample             | PCA No. | Collection No | Genus     | Taxonomy (in collection)                                                     | Updated taxonomy/Synonym of <sup>2</sup>                                        | Geographical Origin         | Collection/supplier* |
|--------------------|---------|---------------|-----------|------------------------------------------------------------------------------|---------------------------------------------------------------------------------|-----------------------------|----------------------|
| DEA_A <sup>§</sup> | 1       | 271012        | Acacia    | <i>Acacia dealbata</i> Link                                                  | Up to date                                                                      | Australia (New South Wales) | FM                   |
| DEA_B <sup>§</sup> | 2       | 78736         | Acacia    | <i>Acacia dealbata</i> Link                                                  | Up to date                                                                      | Unknown                     | Kew                  |
| DEC_A <sup>§</sup> | 3       | 271009        | Acacia    | <i>Acacia decurrens</i> Willd.                                               | <i>Acacia decurrens</i> (J.C.Wendl.) Willd.                                     | Australia (New South Wales) | FM, collected 1898   |
| DEC_B <sup>§</sup> | 4       | 58563         | Acacia    | <i>Acacia decurrens</i> Willd.                                               | <i>Acacia decurrens</i> (J.C.Wendl.) Willd.                                     | Australia (Tasmania)        | Kew                  |
| MEA_A <sup>§</sup> | 12      | 78735         | Acacia    | <i>Acacia mearnsii</i>                                                       | <i>Acacia mearnsii</i> De Wild.                                                 | Australia (New South Wales) | Kew                  |
| MEA_C              | 13      | 78707         | Acacia    | <i>Acacia mearnsii</i>                                                       | <i>Acacia mearnsii</i> De Wild.                                                 | South Africa                | Kew                  |
| MIC_A <sup>§</sup> | 14      | 271013        | Acacia    | <i>Acacia microbotrya</i> Benth.                                             | Up to date                                                                      | Australia (New South Wales) | FM, collected 1898   |
| VES_A <sup>§</sup> | 56      | 271016        | Acacia    | <i>Acacia vestita</i> Ker Gawl.                                              | Up to date                                                                      | Australia (New South Wales) | FM, collected 1898   |
| PEN_A <sup>§</sup> | 20      | 271014        | Acacia    | <i>Acacia penninervis</i> Sieber ex DC.                                      | Up to date                                                                      | Australia (New South Wales) | FM, collected 1898   |
| PEN_B <sup>§</sup> | 21      | 58701         | Acacia    | <i>Acacia penninervis</i>                                                    | <i>Acacia penninervis</i> Sieber ex DC.                                         | Australia (New South Wales) | Kew                  |
| FER_A <sup>§</sup> | 7       | 273717        | Senegalia | <i>Acacia ferruginea</i>                                                     | <i>Senegalia ferruginea</i> (DC.) Pedley                                        | India                       | FM, acquired 1912    |
| FER_B <sup>§</sup> | 8       | 58587         | Senegalia | <i>Acacia ferruginea</i>                                                     | <i>Senegalia ferruginea</i> (DC.) Pedley                                        | India (Madura)              | Kew                  |
| MOD_A              | 15      | 78656         | Senegalia | <i>Acacia modesta</i>                                                        | <i>Senegalia modesta</i> (Wall.) P.J.H.Hurter                                   | India                       | Kew                  |
| POL_A <sup>§</sup> | 22      | 78678         | Senegalia | <i>Acacia polyacantha</i>                                                    | <i>Senegalia polyacantha</i> (Willd.) Seigler & Ebinger                         | Nigeria                     | Kew                  |
| POL_C              | 23      | 78672         | Senegalia | <i>Acacia polyacantha</i> Willd. ssp. <i>campylacantha</i> (A. Rich.) Brenan | <i>Senegalia polyacantha</i> Willd. ssp. <i>campylacantha</i> (A. Rich.) Brenan | Nigeria                     | Kew                  |

|                    |    |         |           |                                                                                 |                                                                                    |                           |                        |
|--------------------|----|---------|-----------|---------------------------------------------------------------------------------|------------------------------------------------------------------------------------|---------------------------|------------------------|
| POL_D              | 24 | 78677   | Senegalia | <i>Acacia polyacantha</i> Willd. ssp. <i>campylacantha</i> (A. Rich.)<br>Brenan | <i>Senegalia polyacantha</i> Willd. ssp. <i>campylacantha</i> (A. Rich.)<br>Brenan | Sudan                     | Kew                    |
| SEN_A <sup>§</sup> | 25 | na      | Senegalia | <i>Acacia senegal</i> (L.) Willd.                                               | <i>Senegalia senegal</i> (L.) Britton                                              | Unknown                   | Zecchi                 |
| SEN_B <sup>§</sup> | 26 | 271356  | Senegalia | <i>Acacia senegal</i> (L.) Willd.                                               | <i>Senegalia senegal</i> (L.) Britton                                              | Pakistan<br>(Balochistan) | FM, acquired 1907      |
| SEN_C <sup>§</sup> | 27 | 269622  | Senegalia | <i>Acacia senegal</i> (L.) Willd.                                               | <i>Senegalia senegal</i> (L.) Britton                                              | Sudan (Kordofan)          | FM, acquired 1904      |
| SEN_D <sup>§</sup> | 28 | 269611  | Senegalia | <i>Acacia senegal</i> (L.) Willd.                                               | <i>Senegalia senegal</i> (L.) Britton                                              | Egypt                     | FM, acquired 1904      |
| SEN_E <sup>§</sup> | 29 | 273715  | Senegalia | <i>Acacia senegal</i> (L.) Willd.                                               | <i>Senegalia senegal</i> (L.) Britton                                              | India                     | FM, acquired 1912      |
| SEN_F <sup>§</sup> | 30 | na      | Senegalia | <i>Gum arabic</i> (unspecified)                                                 | <i>Senegalia senegal</i> (L.) Britton                                              | Sudan                     | JT                     |
| SEN_G <sup>§</sup> | 31 | na      | Senegalia | <i>Gum arabic</i> (unspecified)                                                 | <i>Senegalia senegal</i> (L.) Britton                                              | Unknown                   | TNN, collected<br>1999 |
| SEN_H <sup>§</sup> | 32 | na      | Senegalia | <i>Gum arabic</i> (unspecified)                                                 | <i>Senegalia senegal</i> (L.) Britton                                              | Kenya                     | Unknown supplier       |
| SEN_I <sup>§</sup> | 33 | na      | Senegalia | <i>Acacia senegal</i> (L.) Willd.                                               | <i>Senegalia senegal</i> (L.) Britton                                              | Western Sudan             | GA, collected 1994     |
| SEN_L <sup>§</sup> | 34 | na      | Senegalia | <i>Acacia senegal</i> (L.) Willd.                                               | <i>Senegalia senegal</i> (L.) Britton                                              | Southeast Sudan           | GA, collected 1999     |
| SEN_M <sup>§</sup> | 35 | na      | Senegalia | <i>Acacia senegal</i> (L.) Willd.                                               | <i>Senegalia senegal</i> (L.) Britton                                              | Southeast Sudan           | GA, collected 1994     |
| DEP_A              | 5  | 78705   | Vachellia | <i>Acacia drepanolobium</i>                                                     | <i>Vachellia drepanolobium</i><br>(Harms ex Y.Sjöstedt)<br>P.J.H.Hurter            | Tanzania                  | Kew                    |
| DEP_B              | 6  | 78662   | Vachellia | <i>Acacia drepanolobium</i>                                                     | <i>Vachellia drepanolobium</i><br>(Harms ex Y.Sjöstedt)<br>P.J.H.Hurter            | Kenya                     | Kew                    |
| FIS_A              | 9  | 78650   | Vachellia | <i>Acacia fischeri</i>                                                          | <i>Vachellia fischeri</i> (Harms)<br>Kyal. & Boatwr.                               | Tanzania                  | Kew                    |
| HOR_A              | 10 | 58615   | Vachellia | <i>Acacia horrida</i>                                                           | <i>Vachellia horrida</i> (L.) Kyal. &<br>Boatwr.                                   | South Africa              | Kew                    |
| LEU_A              | 11 | 78698   | Vachellia | <i>Acacia leucophloea</i>                                                       | <i>Vachellia leucophloea</i> (Roxb.)<br>Maslin, Seigler & Ebinger                  | India (Mumbai)            | Kew                    |
| SEY_A <sup>§</sup> | 36 | 2108830 | Vachellia | <i>Acacia seyal</i> Del. <sup>§</sup>                                           | <i>Vachellia seyal</i> (Delile)<br>P.J.H.Hurter                                    | Unknown                   | FM, acquired 1995      |
| SEY_B <sup>§</sup> | 37 | 78686   | Vachellia | <i>Acacia seyal</i> Del.                                                        | <i>Vachellia seyal</i> (Delile)<br>P.J.H.Hurter                                    | Niger                     | Kew                    |

|         |    |        |           |                                                                                                       |                                                                                     |                     |                        |
|---------|----|--------|-----------|-------------------------------------------------------------------------------------------------------|-------------------------------------------------------------------------------------|---------------------|------------------------|
| SEY_C§  | 38 | 78685  | Vachellia | <i>Acacia seyal</i> Del.                                                                              | <i>Vachellia seyal</i> (Delile)<br>P.J.H.Hurter                                     | Niger               | Kew                    |
| SEY_D§  | 39 | 78780  | Vachellia | <i>Acacia seyal</i> Del.                                                                              | <i>Vachellia seyal</i> (Delile)<br>P.J.H.Hurter                                     | Niger               | Kew                    |
| SEY_E§  | 40 | 78680  | Vachellia | <i>Acacia seyal</i> Del.                                                                              | <i>Vachellia seyal</i> (Delile)<br>P.J.H.Hurter                                     | Niger               | Kew                    |
| SEY_F§  | 41 | 78648  | Vachellia | <i>Acacia seyal</i> Del. var. <i>seyal</i>                                                            | <i>Vachellia seyal</i> var. <i>seyal</i>                                            | Tanzania            | Kew, acquired 1995     |
| SEY_G§  | 42 | na     | Vachellia | <i>Acacia seyal</i> Del. var. <i>fistula</i>                                                          | <i>Vachellia seyal</i> var. <i>fistula</i><br>(Schweinf.) Kyal. & Boatwr.           | Sudan<br>(Khartoum) | GA, collected 1999     |
| SEY_H§  | 43 | na     | Vachellia | <i>Acacia seyal</i> Del. var. <i>seyal</i>                                                            | <i>Vachellia seyal</i> var. <i>seyal</i>                                            | Southeast Sudan     | GA, collected 1997     |
| SEY_I§  | 44 | na     | Vachellia | <i>Acacia seyal</i> Del. var. <i>fistula</i>                                                          | <i>Vachellia seyal</i> var. <i>fistula</i><br>(Schweinf.) Kyal. & Boatwr.           | Unknown             | CWSP                   |
| SEY_L§  | 45 | na     | Vachellia | <i>Acacia seyal</i> Del.                                                                              | <i>Vachellia seyal</i> (Delile)<br>P.J.H.Hurter                                     | Unknown             | AR                     |
| SEY_M   | 46 | 58333  | Vachellia | <i>Acacia seyal</i>                                                                                   | <i>Vachellia seyal</i> (Delile)<br>P.J.H.Hurter                                     | Sudan               | Kew, collected in 1911 |
| SIE_A   | 47 | 78699  | Vachellia | <i>Acacia sieberiana</i> DC.                                                                          | <i>Vachellia sieberiana</i> (DC.)<br>Kyal. & Boatwr.                                | Nigeria             | Kew                    |
| STEN_A§ | 48 | 269608 | Vachellia | <i>Acacia stenocarpa</i> Hochst. ex A.<br>Rich.                                                       | <i>Vachellia seyal</i> var. <i>seyal</i>                                            | Egypt               | FM, acquired 1904      |
| STEN_B  | 49 | 269609 | Vachellia | <i>Acacia stenocarpa</i> Hochst. ex A.<br>Rich.                                                       | <i>Vachellia seyal</i> var. <i>seyal</i>                                            | Egypt               | FM                     |
| STEN_C  | 50 | 269607 | Vachellia | <i>Acacia stenocarpa</i> Hochst. ex A.<br>Rich                                                        | <i>Vachellia seyal</i> var. <i>seyal</i>                                            | Egypt               | FM                     |
| STU_A   | 51 | 78649  | Vachellia | <i>Acacia stuhlmannii</i> Taubert                                                                     | <i>Vachellia stuhlmannii</i> (Taub.)<br>Kyal. & Boatwr.                             | Tanzania            | Kew                    |
| TOR_A§  | 52 | 78718  | Vachellia | <i>Acacia tortilis</i> (Forssk.) Hayne<br>ssp. <i>raddiana</i> (Savi) Brenan var.<br><i>pubescens</i> | <i>Vachellia tortilis</i> subsp.<br><i>raddiana</i> (Savi) Kyal. &<br>Boatwr.       | Unknown             | Kew                    |
| TOR_B   | 53 | 78727  | Vachellia | <i>Acacia tortilis</i> (Forssk.) Hayne<br>ssp. <i>heteracantha</i> (Burch.)<br>Brenan                 | <i>Vachellia tortilis</i> subsp.<br><i>heteracantha</i> (Burch.) Kyal. &<br>Boatwr. | Unknown             | Kew                    |

|                    |    |       |           |                                                                                        |                                                                               |                         |     |
|--------------------|----|-------|-----------|----------------------------------------------------------------------------------------|-------------------------------------------------------------------------------|-------------------------|-----|
| TOR_C              | 54 | 78647 | Vachellia | <i>Acacia tortilis</i> (Forssk.) Hayne<br>ssp. <i>raddiana</i> (Savi) Brenan           | <i>Vachellia tortilis</i> subsp.<br><i>raddiana</i> (Savi) Kyal. &<br>Boatwr. | Sudan                   | Kew |
| TOR_D              | 55 | 78696 | Vachellia | <i>Acacia tortilis</i> (Forsskal) Hayne<br>ssp. <i>spirocarpa</i> (A. Rich.)<br>Brenan | <i>Vachellia tortilis</i> (Forssk.)<br>Galasso & Banfi                        | Tanzania                | Kew |
| NIL_A <sup>§</sup> | 16 | 58668 | Vachellia | <i>Acacia nilotica</i>                                                                 | <i>Vachellia nilotica</i> (L.)<br>P.J.H.Hurter & Mabb.                        | South Africa<br>(Natal) | Kew |
| NIL_F              | 17 | 58646 | Vachellia | <i>Acacia nilotica</i>                                                                 | <i>Vachellia nilotica</i> (L.)<br>P.J.H.Hurter & Mabb.                        | India                   | Kew |
| NIL_G              | 18 | 58643 | Vachellia | <i>Acacia nilotica</i>                                                                 | <i>Vachellia nilotica</i> (L.)<br>P.J.H.Hurter & Mabb.                        | Pakistan                | Kew |
| NIL_H              | 19 | 58644 | Vachellia | <i>Acacia nilotica</i>                                                                 | <i>Vachellia nilotica</i> (L.)<br>P.J.H.Hurter & Mabb.                        | India                   | Kew |

\*Samples obtained from the following collections/suppliers: Kew=Royal Botanic Gardens, Kew, UK; FM=The Field Museum, Chicago, IL, USA; GA=Gandil Agricultural Co. Ltd., Karthoum, Sudan (A. Karamallah); Zecchi, Florence, Italy; CWSP=Centre for Water Soluble Polymers, Wrexham, UK; AR=Alland & Robert, Port-Mort, France; JT=Jack Thompson, OR, USA; TNN=Tessa Neylan Nolan, Nakuru, Kenya.

§Analyzed in previous work.<sup>1</sup>

## 2. MALDI-TOF MS analysis of pigmented *S. senegal* reference samples

*S. senegal*, prepared with 1 part gum and 2 parts water, was combined with various pigments (30% w/w) and brushed onto a glass slide. The paint was left to air dry for 1 week, sampled and analyzed within a month. The pigments used were: ivory black, minium ( $\text{Pb}_3\text{O}_4$ ), iron oxide ( $\text{Fe}_2\text{O}_3$ ), malachite ( $\text{Cu}_2\text{CO}_3(\text{OH})_2$ ), calcite ( $\text{CaCO}_3$ ), cadmium orange ( $\text{CdS}$ ), viridian ( $\text{Cr}_2\text{O}_3$ ), cobalt blue ( $\text{CoO} \cdot \text{Al}_2\text{O}_3$ ), orpiment ( $\text{As}_2\text{S}_3$ ), zinc white ( $\text{ZnO}$ ) and madder. Representative mass fingerprints of some of the mockups are reported in Figure S1. The PCA scores plot of the acaciae reference samples, together with the pigmented ones, is shown in Figure S2.

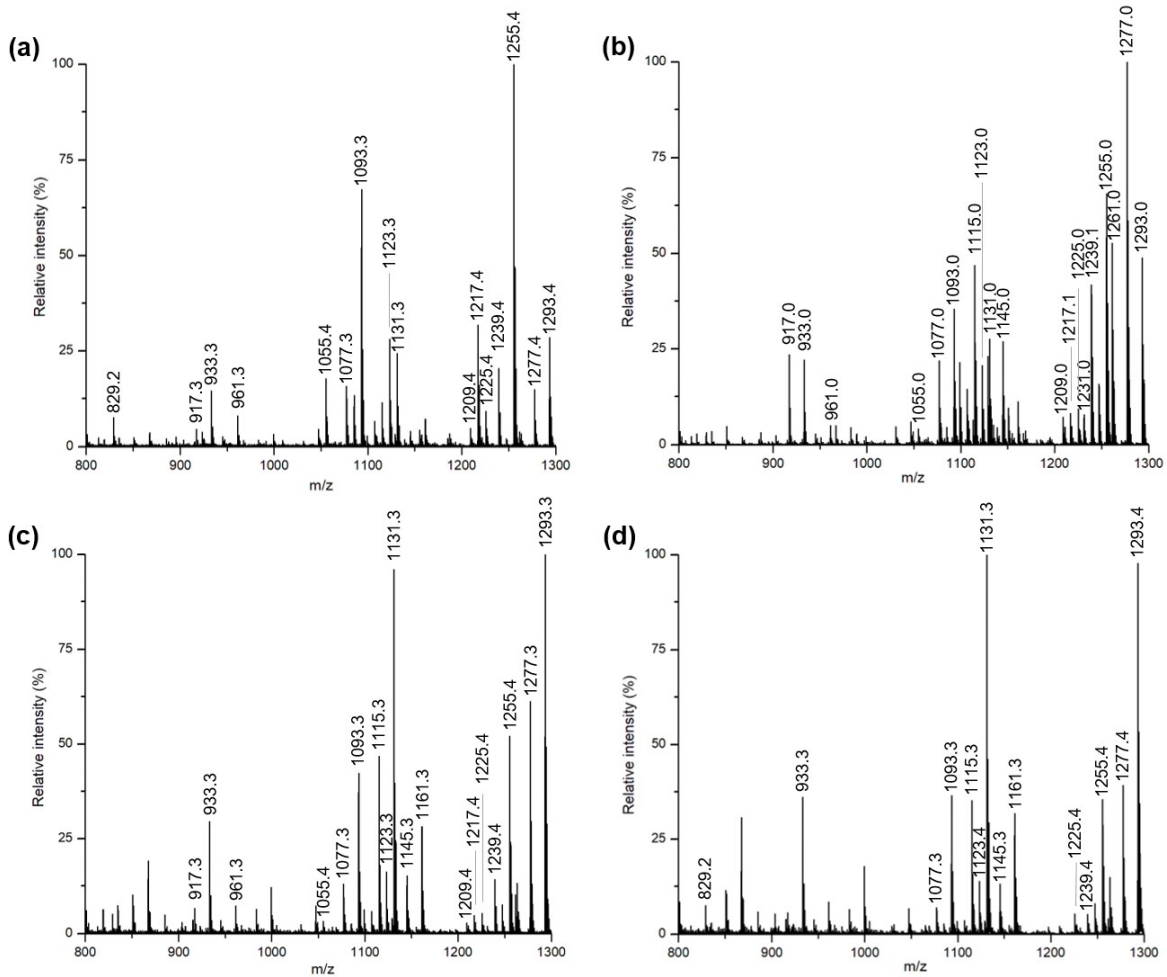

Figure S1

MALDI-TOF MS mass spectra of reference *S. senegal* combined with (a) calcite, (b) malachite, (c) iron oxide, and (d) orpiment, mass range 800-1300 Da. Only the  $m/z$  values of diagnostic ions are reported in the spectra. For the list of diagnostic ions of *S. senegal* see Granzotto et al. 2017.<sup>3</sup>

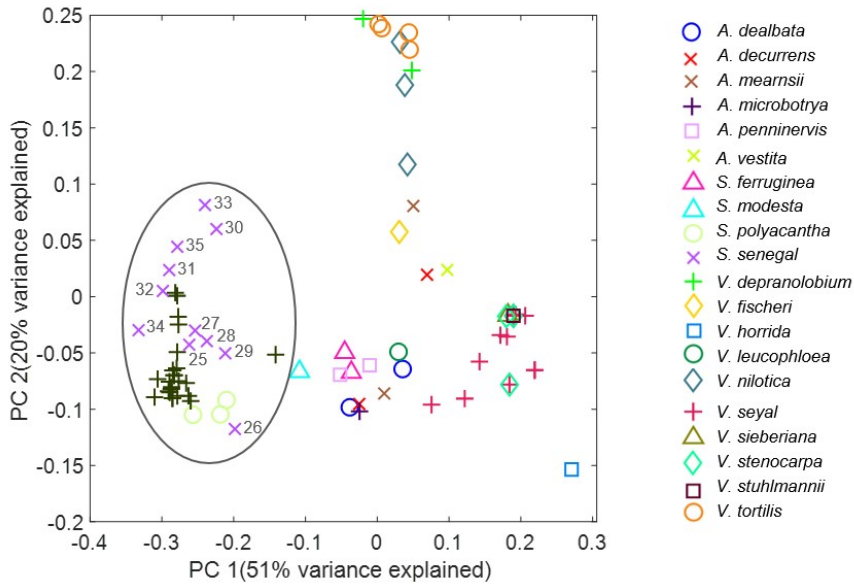

Figure S2  
 PCA scores plot (PC1 vs PC2) with legend of MALDI-TOS MS data of reference acaciae samples, including the pigmented *S. senegal* samples (dark green plus sign).

3. PC1 and PC3 scores plot of acaciae reference and historic samples, with legend

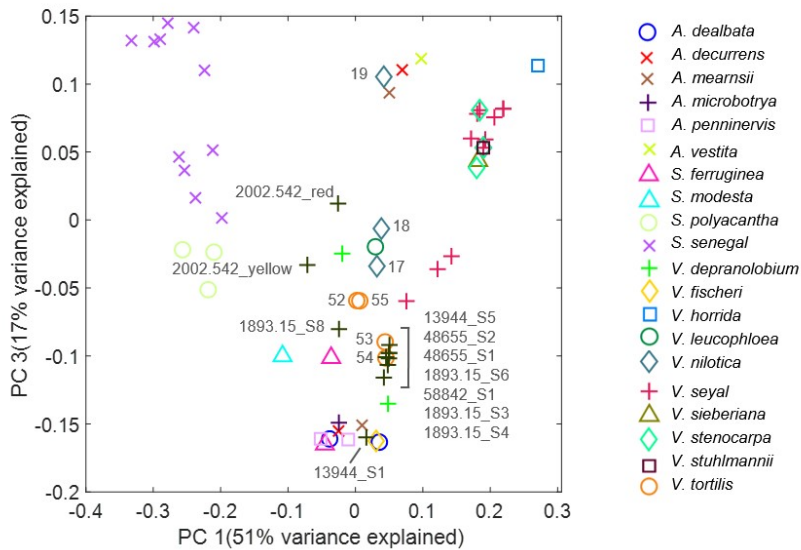

Figure S3  
 PCA scores plot (PC1 vs PC3) with legend of MALDI-TOF MS data of reference acaciae samples and historic samples. *V. tortilis*, *V. nilotica* and samples from artworks are labeled.

#### 4. Mummy cartonnage (AIC 1893.15): analysis results and parameters.

The binding medium for all samples was identified as a gum from, most likely, the plant species *Vachellia tortilis* or *V. nilotica*, except in the case of the green paint, for which it was not determined.

Table S2. Results of pigment analysis

| Color, layer  | Pigment ID and binding medium                                                                            |
|---------------|----------------------------------------------------------------------------------------------------------|
| White, ground | Calcite (CaCO <sub>3</sub> ) <sup>a,b</sup> mixed with mammalian animal glue <sup>c</sup>                |
| Yellow, paint | Goethite (FeO(OH)) <sup>a,c</sup> and possibly orpiment (As <sub>2</sub> S <sub>3</sub> ) <sup>b,c</sup> |
| Blue, paint   | Egyptian blue (CaCuSi <sub>4</sub> O <sub>10</sub> ) <sup>a-d</sup>                                      |
| Red, paint    | Hematite (Fe <sub>2</sub> O <sub>3</sub> ) <sup>b,3</sup>                                                |
| Green, paint  | Atacamite (Cu <sub>2</sub> Cl(OH) <sub>3</sub> ) sometimes mixed with Egyptian blue <sup>a,b,d</sup>     |
| Black, paint  | Carbon-based black                                                                                       |

#### Methods of analysis

<sup>a</sup>FTIR

<sup>b</sup>XRF

<sup>c</sup>HSI

<sup>d</sup>VIL

<sup>e</sup>Proteomics

#### Fourier transform infrared spectroscopy (FTIR)

A portion of each sample was mounted on a Specac diamond compression cell. Analysis was performed with a Bruker Hyperion 3000 FTIR microscope equipped with mercury cadmium telluride D315 detector interfaced to a Tensor 27 spectrometer bench. Data were collected in transmission mode between 4000 and 400 cm<sup>-1</sup> at 4 cm<sup>-1</sup> resolution and 256-512 scans per spectrum according to the response of the different samples. Data were interpreted with reference to published literature and databases.

#### X-ray fluorescence (XRF)

Analysis was performed non-invasively with an open-architecture Bruker Artax X-ray fluorescence spectrometer and a Mo excitation tube, radiation at 50 kV, 400 μA, with a 1.5 mm collimator, no filter used, acquiring each spectrum live-time for 180 seconds with a helium stream (60 L/min at the analyzed surface) for improved detection of light elements. The system is equipped with an X-Flash® X-ray detector, with energy resolution 160-165 eV for Mn-K<sub>α</sub> at 10 keps. Analysis was performed by positioning the instrument at the correct distance from the artwork's surface by using the integrated focusing system.

#### Hyperspectral imaging (HSI)

HSI was undertaken in the c. 400-900 nm range using a Resonon Pika II pushbroom camera and tungsten-halogen radiation sources.

#### Visible-induced luminescence (VIL)

VIL imaging was performed using a Nikon D850 modified camera and Nikon SB80DX flashes equipped with suitable filters.<sup>4</sup>

#### Proteomics

Protein extraction and enzymatic digestion with LysC and Trypsin was performed as described in Mackie et al. 2018.<sup>5</sup> The resulting peptides were desalted on C18 spin columns and analyzed by LC-MS/MS using



a DionexUltiMate 3000 Rapid Separation LC system and a linear ion trap - Orbitrap hybrid Elite mass spectrometer or QEHF (Thermo Fisher Scientific). The LC was equipped with a 75  $\mu\text{m}$   $\times$  10.5 cm PicoChip analytical column packed with 3  $\mu\text{m}$  ReproSil-Pur® beads. The flow rate was kept at 300 nL/min. Solvent A was 0.1% FA in water and Solvent B was 0.1% FA in ACN. The peptide was separated on a 120-min analytical gradient from 5% ACN/0.1% FA to 40% ACN/0.1% FA. The mass spectrometer was operated in data-dependent mode, source voltage was 2.40 kV and the capillary temperature was 275°C. MS1 scans were acquired from 400 to 2000 m/z at 60,000 resolving power. The top fifteen most abundant precursor ions in each MS1 scan were selected for fragmentation by collision-induced dissociation. Raw data were searched against a SwissProt database (January 2017), followed by other searches with different homemade databases downloaded from UniProt, and processed with MaxQuant software version 1.6.1.0. For specific parameters refer to Granzotto et al. 2021.<sup>6</sup>

## 5. Bibliography

1. C. Granzotto, K. Sutherland, J. Arslanoglu and G. A. Ferguson, Discrimination of Acacia gums by MALDI-TOF MS: applications to micro-samples from works of art, *Microchem. J.*, 2019, **144**, 229–241.
2. POWO Plants of the World Online. Facilitated by the Royal Botanic Gardens, Kew, <http://www.plantsoftheworldonline.org> (05 December 2022)
3. C. Granzotto, J. Arslanoglu, C. Rolando, C. Tokarski, Plant gum identification in historic artworks, *Sci. Rep.*, 2017, **7**, 44538.
4. G. Verri, The application of visible-induced luminescence imaging to the examination of museum objects, *Proceedings of SPIE, the International Society for Optical Engineering*, 2009, 7391051-7391063.
5. M. Mackie, P. Rütger, D. Samodova, F. Di Gianvincenzo, C. Granzotto, D. Lyon, D. A. Pegg, H. Howard, L. Harrison, L. J. Jensen, J. V. Olsen, E. Cappellini, Palaeoproteomic Profiling of Conservation Layers on a 14th Century Italian Wall Painting, *Angew. Chem., Int. Ed.*, 2018, **57(25)**, 7369–7374.
6. C. Granzotto, K. Sutherland, Y. A. Goo, A. Aksamija, Characterization of surface materials on African sculptures: new insights from a multi-analytical study including proteomics, *Analyst*, 2021, **146**, 3305.
