# Supplementary figures and images for: New insight from MALDI-TOF MS and multivariate data analysis on the botanical origin of polysaccharide-based paint binders in ancient Egypt
Source: Royal Society of Chemistry journal article supplement (doi:10.1039/d3ay02214e), 2024-01-01

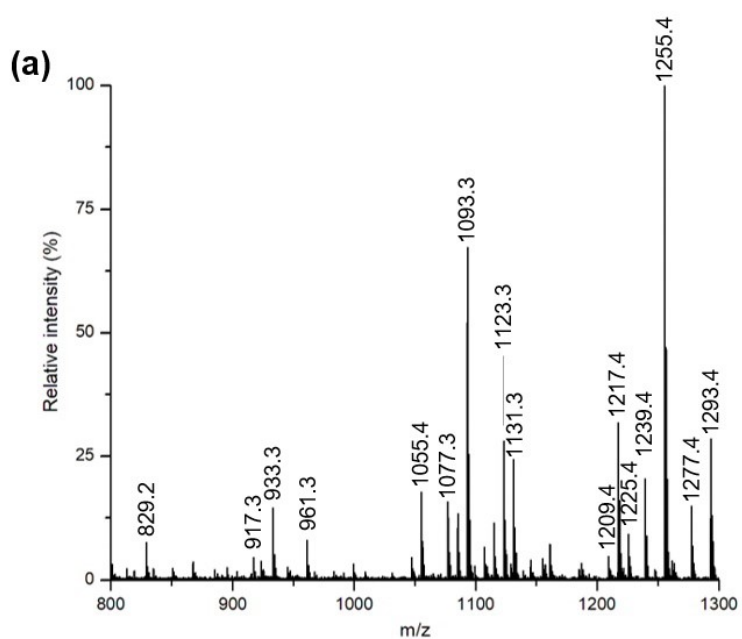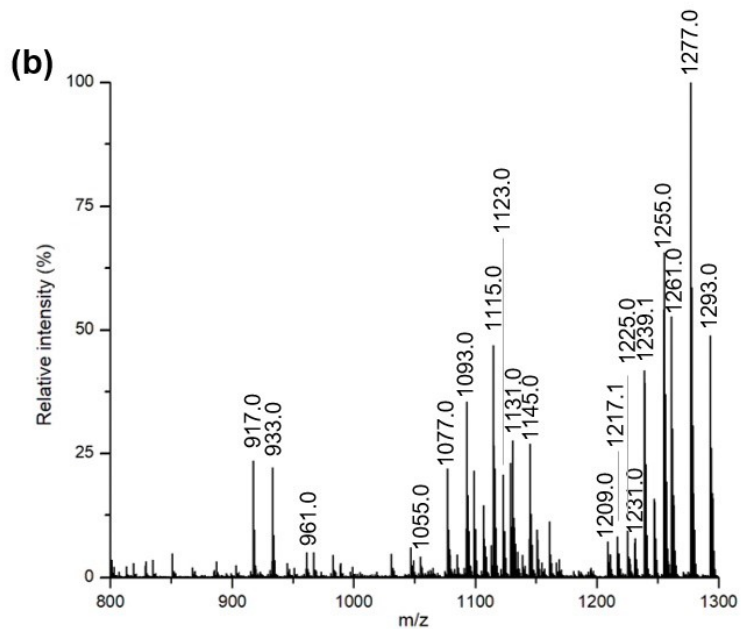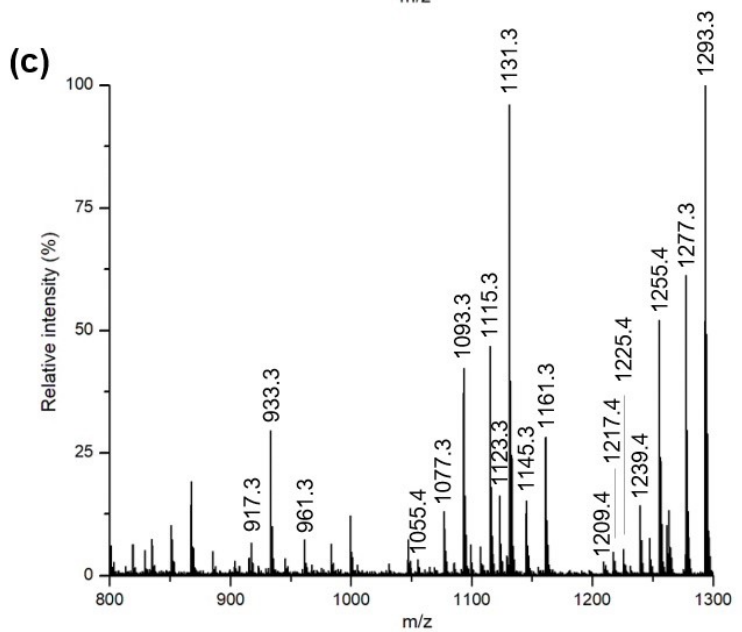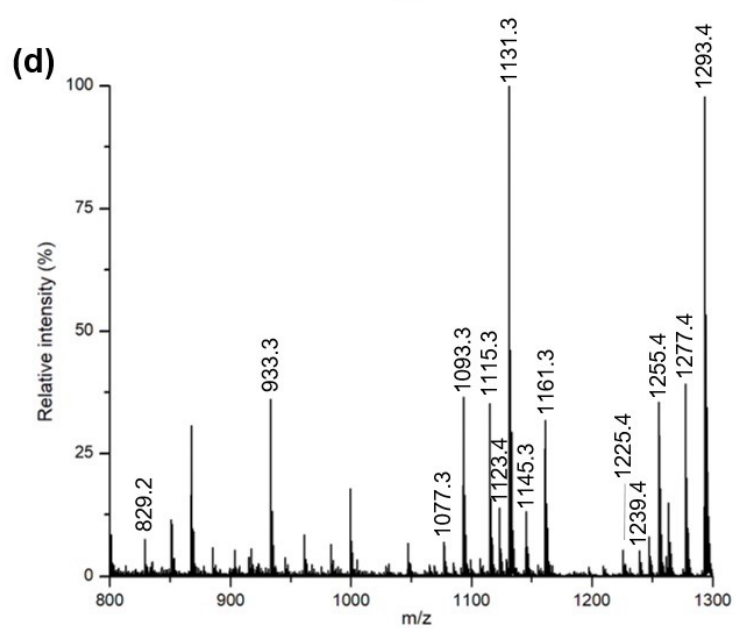

Supplement: d3ay02214e2.pdf [file d3ay02214e2.pdf]

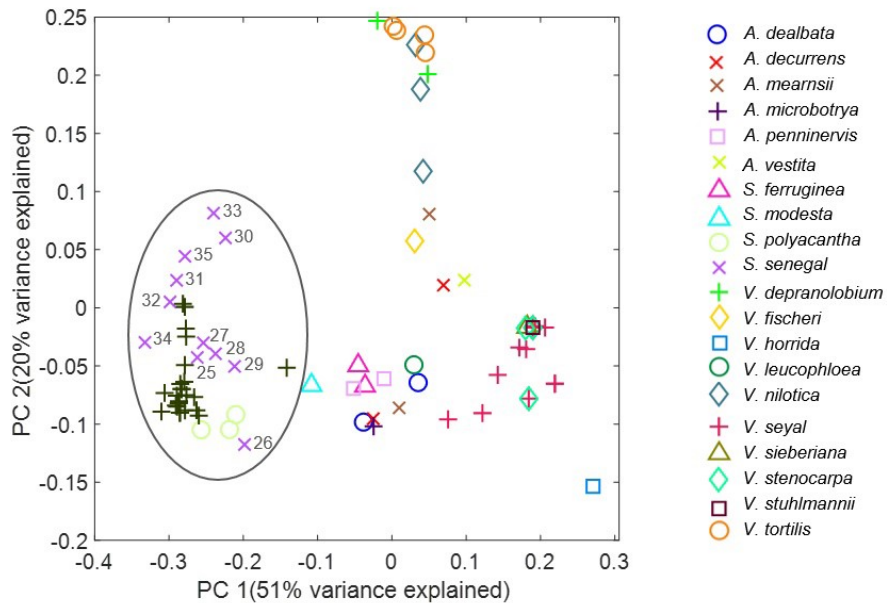

Supplement: d3ay02214e3.pdf [file d3ay02214e3.pdf]

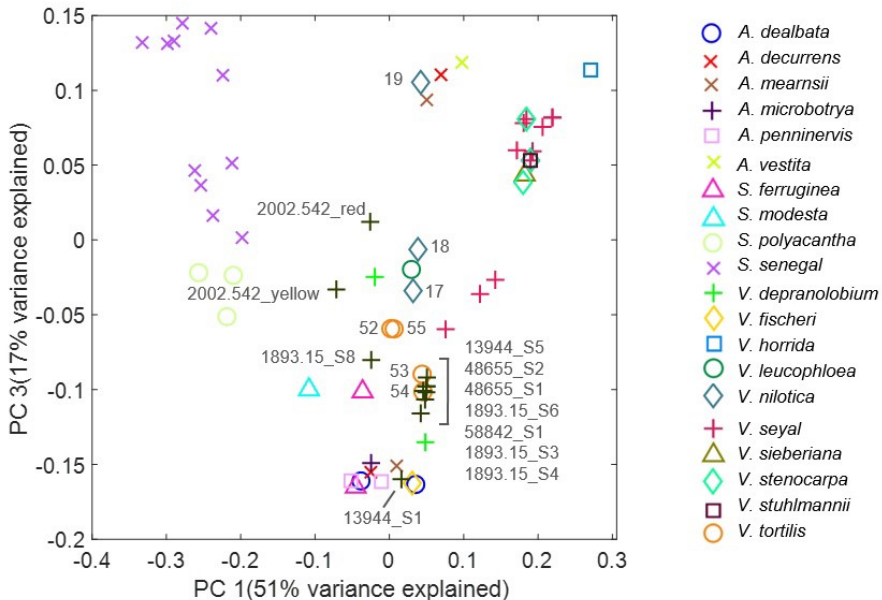

Supplement: d3ay02214e4.pdf [file d3ay02214e4.pdf]
